# Supplementary material
Source: PubMed Central journal article supplement (PMC3625467)
Supplement: NIHMS438756-supplement-4.pdf [file NIHMS438756-supplement-4.pdf]

Supplementary Figure 3 Konstantinidou G. et al.

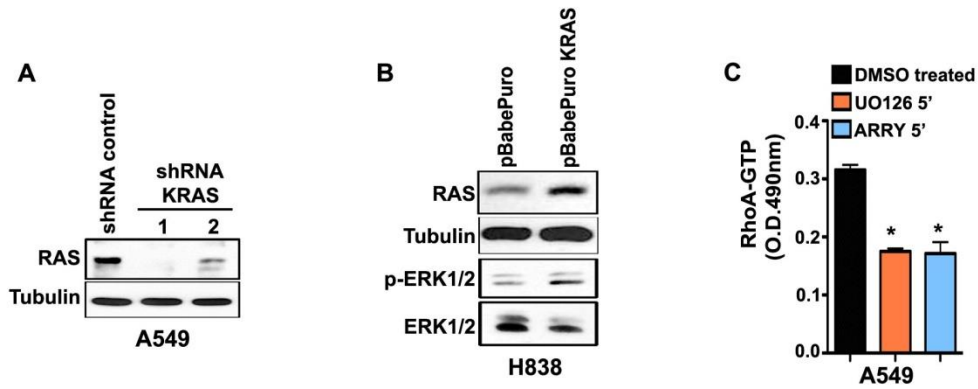

**Supplementary Figure S3. MEK/ERK inhibition suppresses RHOA.** (A) Immunoblot of A549 NSCLC cells transduced with 2 independent shRNAs against KRAS. (B) Immunoblot of H838 NSCLC cells (wild type *KRAS*, *INK4a/ARF* deficient) transduced either with an empty retrovirus or a retrovirus-expressing mutant KRAS. (C) G-LISA assay showing RHOA-GTP levels of A549 NSCLC cells as early as 5 minutes upon treatment with the indicated MEK1/2 inhibitors. ARRY: ARRY-142886; \* $P < 0.03$ .
