# Supplementary material
Source: PubMed Central journal article supplement (PMC3625467)
Supplement: NIHMS438756-supplement-5.pdf [file NIHMS438756-supplement-5.pdf]

Supplementary Figure 4 Konstantinidou G. et al.

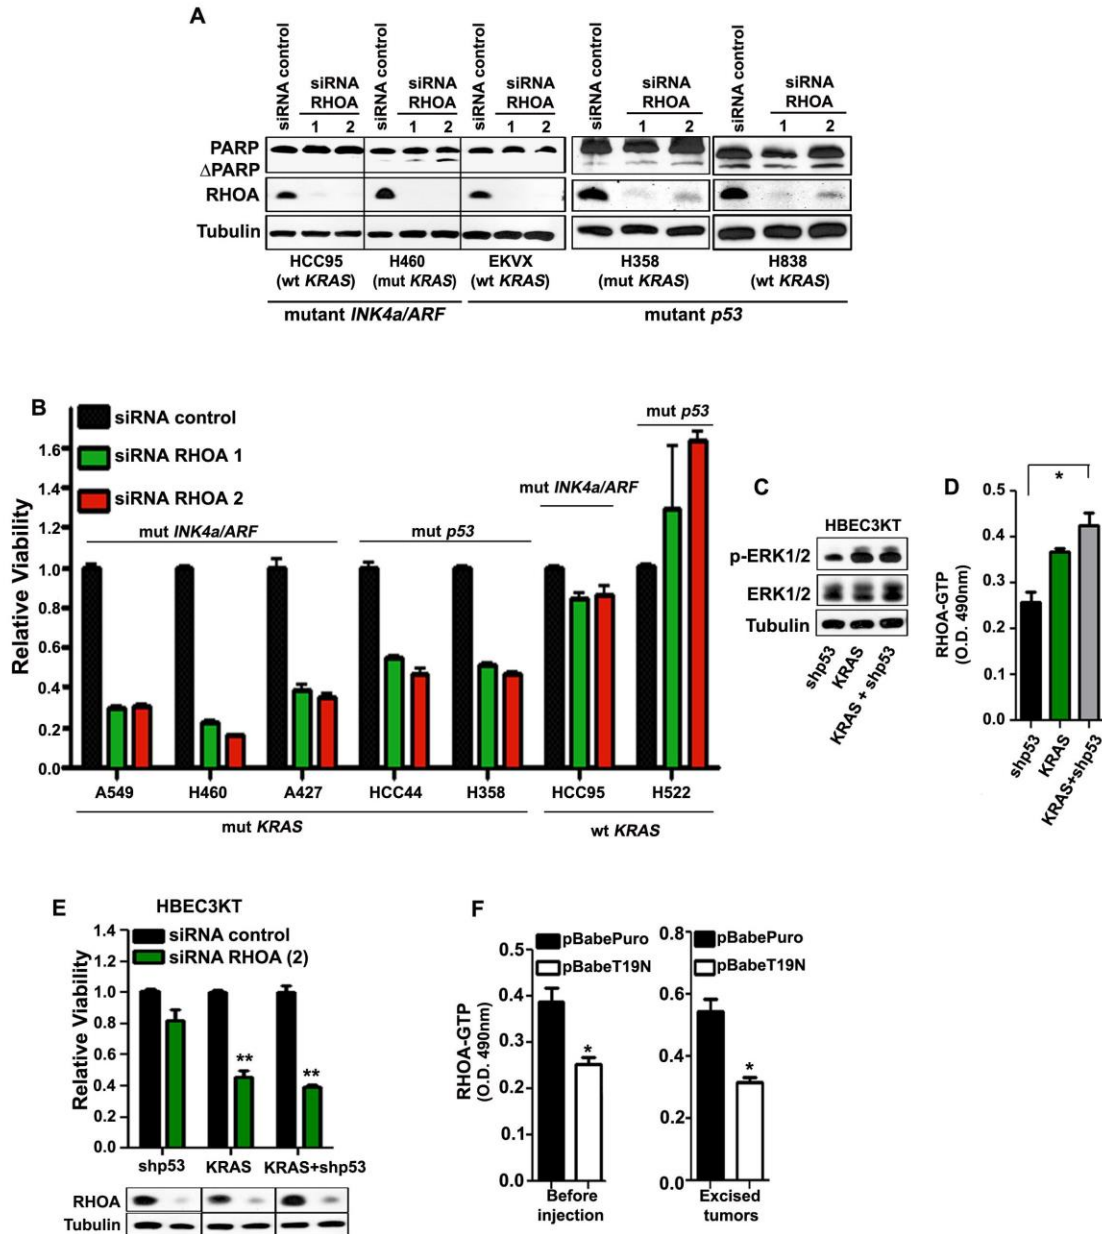

**Supplementary Figure S4. RHOA activation is required for the maintenance of NSCLC cells expressing mutant KRAS.** (A) Immunoblot showing total (PARP) and cleaved PARP ( $\Delta$ PARP) in NSCLC cells treated as indicated. The genotypes of the cells

are indicated. Mut: mutant. Wt: wild type. **(B)** Histogram showing viability of the indicated NSCLC cells 120h after transfection with RHOA or control siRNAs. The mutation status of the cell lines is indicated. Mut: mutant. Wt: wild type. **(C)** Immunoblot showing total ERK1/2 and p-ERK1/2 in HBEC3KT cells transduced with pBabePuro-KRAS<sup>G12V</sup> and/or an shRNA against p53. **(D)** G-LISA assay showing RHOA-GTP levels in HBEC3KT cells transduced as indicated. Mean  $\pm$  s.e.m. \* $P < 0.03$ . **(E)** Upper panel: histograms showing viability of HBEC3KT cells transduced as indicated and transfected with RHOA or control siRNAs. The relative viability was calculated 72h after siRNA transfection. Mean  $\pm$  s.e.m. \*\* $P < 0.007$ . Lower panel: Immunoblot showing RHOA knockdown efficiency. Every lane matches the corresponding column of the histogram above. **(F)** G-LISA assay showing RHOA-GTP levels of A549 cells transduced as indicated, either before implantation in athymic nude mice or in excised tumors. Mean  $\pm$  s.d. \* $P < 0.05$ .
