# Supplementary material
Source: PubMed Central journal article supplement (PMC3625467)
Supplement: NIHMS438756-supplement-6.pdf [file NIHMS438756-supplement-6.pdf]

Supplementary Figure 5 Konstantinidou G. et al.

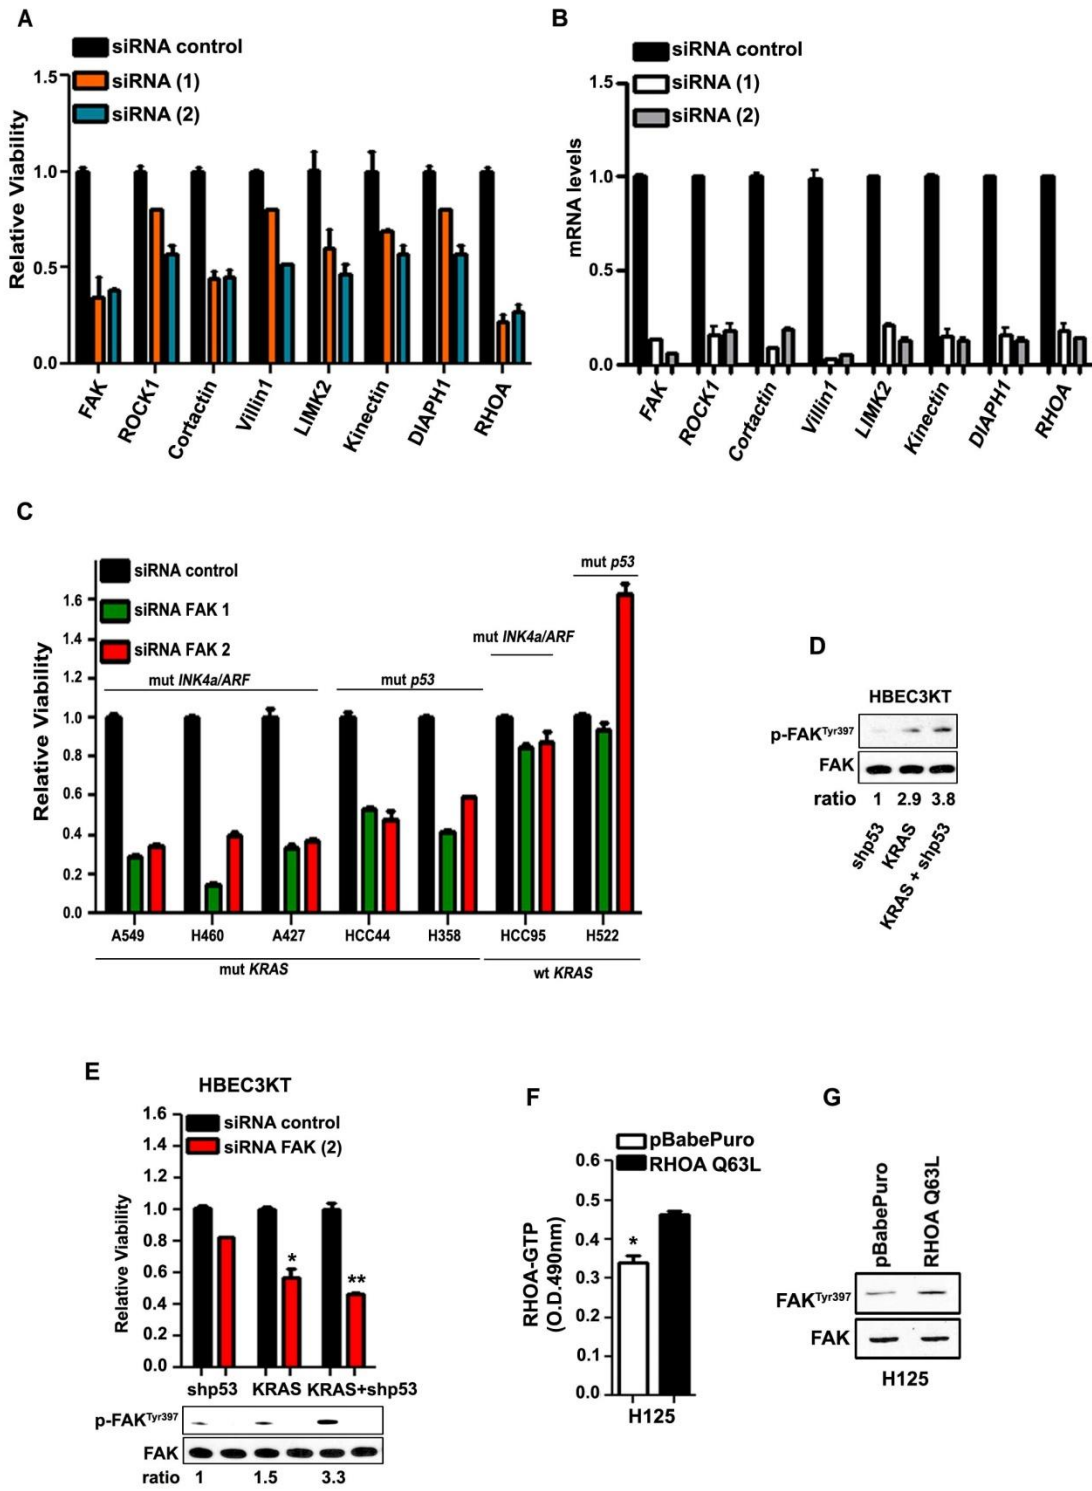

**Supplementary Figure S5. RHOA-FAK signaling in NSCLC cells *in vitro*.** (A) Histogram showing viability of H460 cells 72h after transfection with the indicated siRNAs. (B) Real-time PCR showing the mRNA levels of the indicated genes in H460 cells treated as in panel (A). (C) Histogram showing viability of the indicated NSCLC cells 120h after transfection with FAK or control siRNAs. The mutation status of the cell lines is indicated. Mut: mutant. Wt: wild type. (D) Immunoblot showing total FAK and p-FAK<sup>Tyr397</sup> in HBEC3KT cells transduced as indicated. (E) Upper panel: the histogram shows viability of HBEC3KT cells transduced as indicated and transfected with FAK or control siRNAs. The relative viability was calculated 72h after siRNA transfection. Mean  $\pm$  s.e.m., \* $P$ <0.02, \*\* $P$ <0.007. Lower panel: Immunoblot showing FAK knockdown efficiency. Every lane matches the corresponding column of the histogram above. (F) G-LISA assay for RHOA-GTP in H125 NSCLC cells (wild type *KRAS*, *INK4a/ARF* deficient) transduced with the indicated retroviral vectors. Mean  $\pm$  s.e.m., \* $P$ <0.05. (G) Immunoblot of H125 cells from (F).
